# Supplementary material
Source: Springer Nature journal article supplement (https://www.springermedizin.de/resource/supplementary/12894_2011_183_MOESM1_ESM.pdf/9513138)

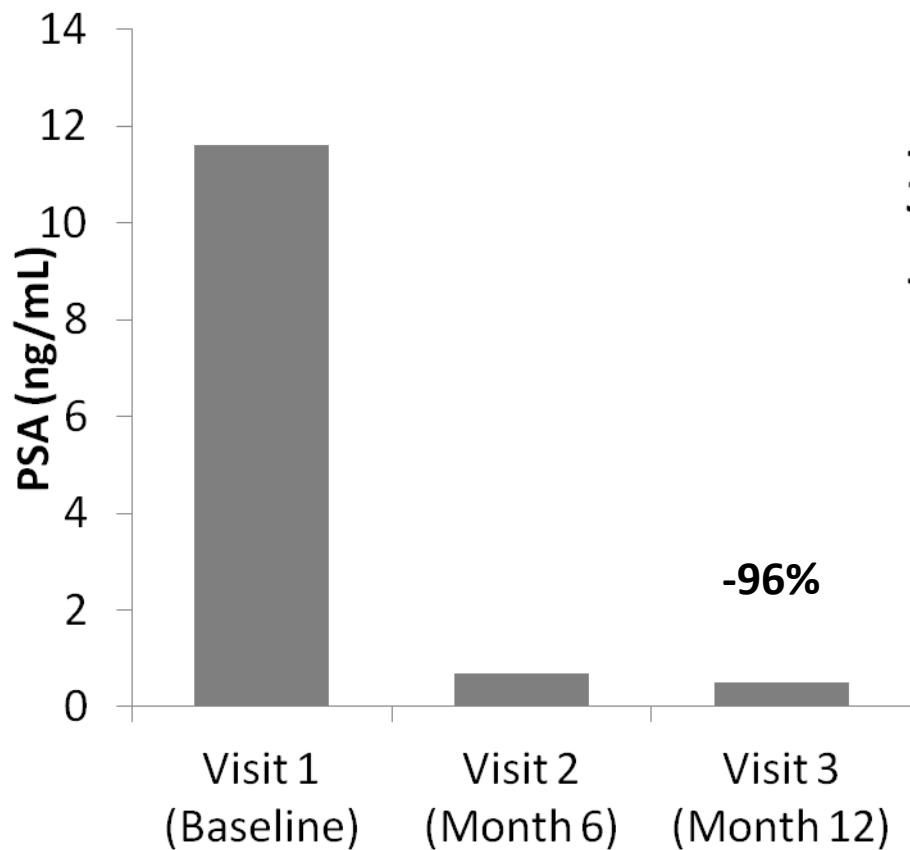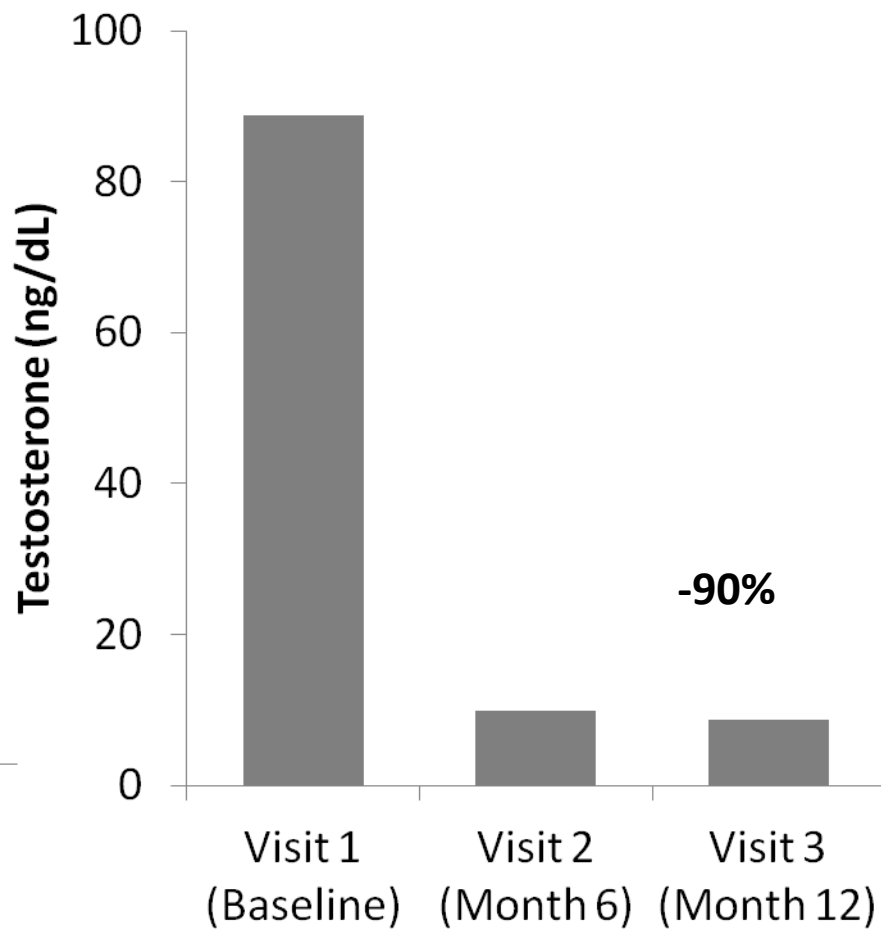

Number of patients (Visit 1; 2; 3); PSA (1254; 1221; 1154), testosterone (231; 350; 300)

Supplement: MOESM1 [file 9513138]
